# Supplementary material
Source: PubMed Central journal article supplement (PMC11027694)

# Supplementary Figure 1

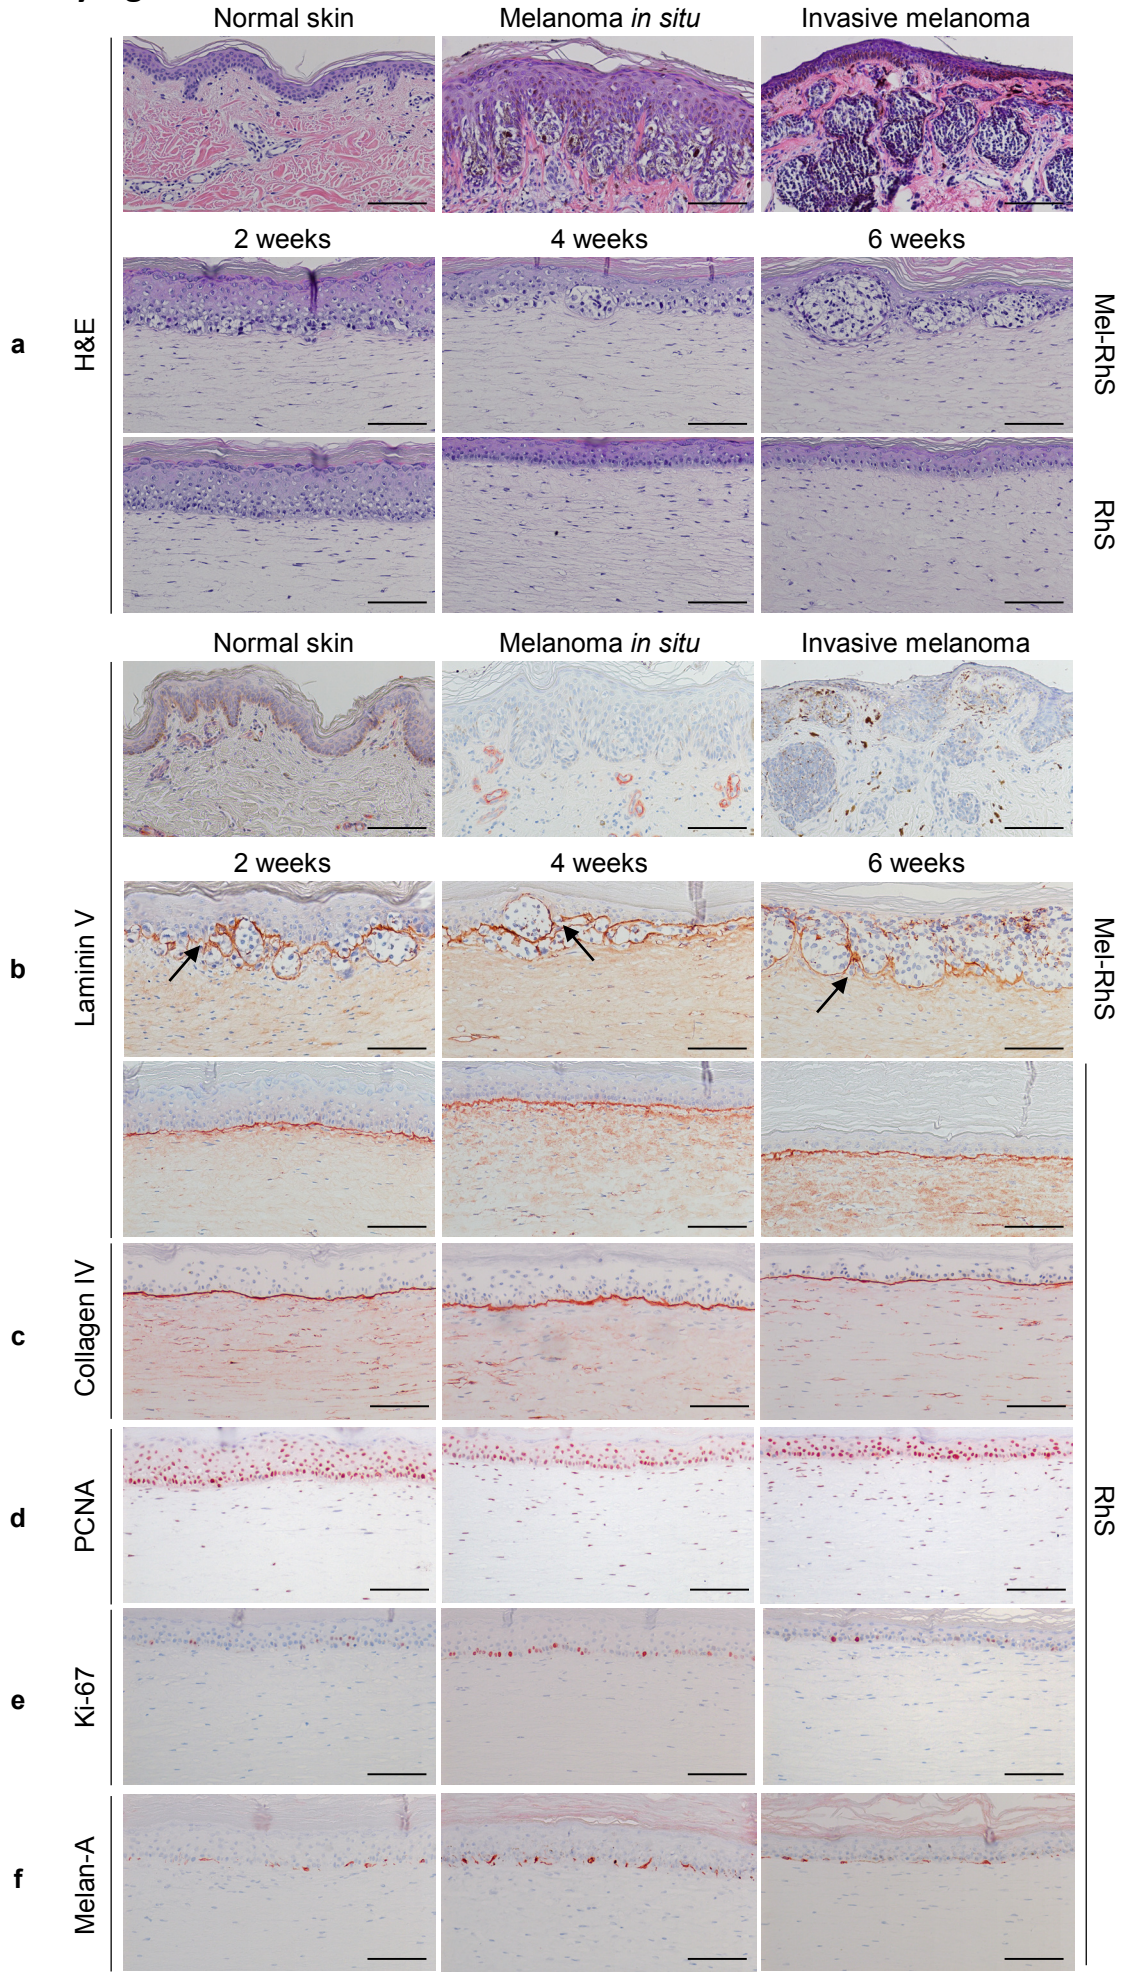

# Supplementary Figure 2

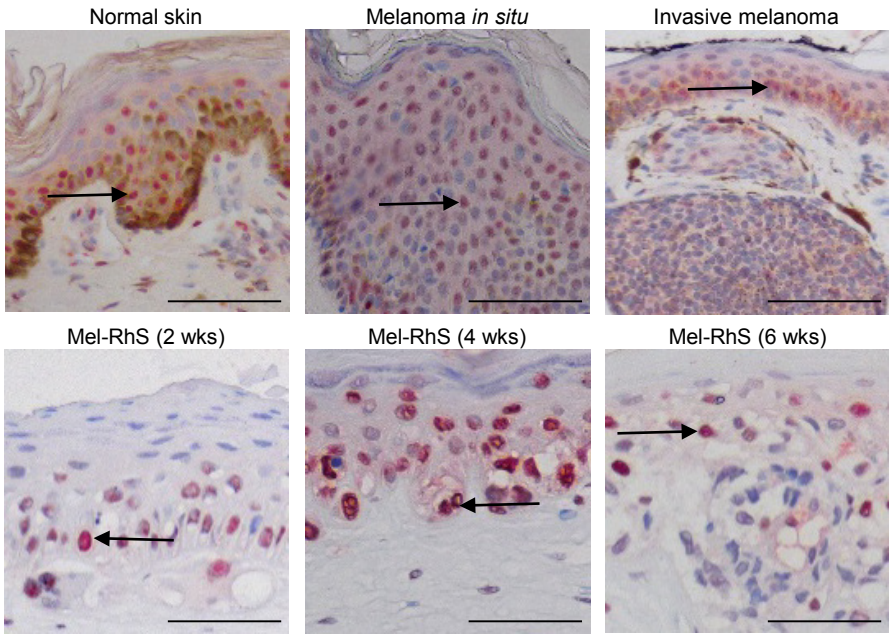

Supplement: 262_2020_2626_MOESM1_ESM.pdf [file 262_2020_2626_MOESM1_ESM.pdf]
